# Supplementary material for: Colonic Gene Expression and Fecal Microbiota in Diarrhea-predominant Irritable Bowel Syndrome: Increased Toll-like Receptor 4 but Minimal Inflammation and no Response to Mesalazine
Source: PubMed Central journal article supplement — J Neurogastroenterol Motil. 2021 Apr 30;27(2):279–91. doi: 10.5056/jnm20205 (PMC8026366; doi:10.5056/jnm20205), 2021-04-30
Supplement: jnm-27-2-279-supple.pdf [file jnm-27-2-279-supple.pdf]

**Supplementary Table 1.** The Mmean Expression Values and the Standard Deviation of All Analyzed the Genes

| Gene    | Description                                                                   | Mean  |       |            |         |        |       | SD         |         |       |       |            |         |        |       |       |       |
|---------|-------------------------------------------------------------------------------|-------|-------|------------|---------|--------|-------|------------|---------|-------|-------|------------|---------|--------|-------|-------|-------|
|         |                                                                               | HC    | BL    | Mesalazine | Placebo | HC     | BL    | Mesalazine | Placebo | HC    | BL    | Mesalazine | Placebo |        |       |       |       |
| ALOX15B | Arachidonate 15-lipoxygenase type B                                           | 0.80  | 0.30  | 0.30       | 0.34    | 1.12   | 0.23  | 0.21       | 0.25    | 0.80  | 0.30  | 0.30       | 0.34    | 1.12   | 0.23  | 0.21  | 0.25  |
| AQP3    | Aquaporin 3                                                                   | 5.60  | 3.80  | 3.41       | 3.68    | 3.09   | 1.22  | 1.20       | 1.03    | 5.60  | 3.80  | 3.41       | 3.68    | 3.09   | 1.22  | 1.20  | 1.03  |
| ATP12A  | ATPase H <sup>+</sup> /K <sup>+</sup> transporting non-gastric alpha2 subunit | 3.52  | 0.32  | 0.25       | 0.43    | 5.54   | 0.51  | 0.37       | 0.75    | 3.52  | 0.32  | 0.25       | 0.43    | 5.54   | 0.51  | 0.37  | 0.75  |
| BDKRB2  | Bradykinin receptor B2                                                        | 10.37 | 17.06 | 12.12      | 13.46   | 3.35   | 6.39  | 3.45       | 3.21    | 10.37 | 17.06 | 12.12      | 13.46   | 3.35   | 6.39  | 3.45  | 3.21  |
| CCL28   | C-C motif chemokine ligand 28                                                 | 69.19 | 57.51 | 50.86      | 46.83   | 28.72  | 22.44 | 14.54      | 14.86   | 69.19 | 57.51 | 50.86      | 46.83   | 28.72  | 22.44 | 14.54 | 14.86 |
| CELA1   | Chymotrypsin like elastase 1                                                  | 0.00  | 0.00  | 0.00       | 0.00    | 0.00   | 0.00  | 0.00       | 0.00    | 0.00  | 0.00  | 0.00       | 0.00    | 0.00   | 0.00  | 0.00  | 0.00  |
| CLDN2   | Claudin 2                                                                     | 0.18  | 0.20  | 0.11       | 0.09    | 0.36   | 0.48  | 0.12       | 0.06    | 0.18  | 0.20  | 0.11       | 0.09    | 0.36   | 0.48  | 0.12  | 0.06  |
| CMA1    | Chymase 1                                                                     | 0.56  | 0.32  | 0.36       | 0.29    | 0.41   | 0.31  | 0.31       | 0.27    | 0.56  | 0.32  | 0.36       | 0.29    | 0.41   | 0.31  | 0.31  | 0.27  |
| CMKLR1  | Chemerin chemokine-like receptor 1                                            | 0.77  | 1.31  | 1.21       | 1.30    | 0.27   | 0.62  | 0.56       | 0.37    | 0.77  | 1.31  | 1.21       | 1.30    | 0.27   | 0.62  | 0.56  | 0.37  |
| CMTM2   | CKLF like MARVEL transmembrane domain containing 2                            | 0.02  | 0.01  | 0.01       | 0.01    | 0.02   | 0.01  | 0.01       | 0.01    | 0.02  | 0.01  | 0.01       | 0.01    | 0.02   | 0.01  | 0.01  | 0.01  |
| CYP2J2  | Cytochrome P450 family 2 subfamily j member 2                                 | 6.14  | 4.49  | 4.49       | 4.34    | 2.61   | 1.42  | 1.41       | 1.27    | 6.14  | 4.49  | 4.49       | 4.34    | 2.61   | 1.42  | 1.41  | 1.27  |
| EPHX2   | Epoxide hydrolase 2                                                           | 15.94 | 17.88 | 16.32      | 15.43   | 4.62   | 5.40  | 4.45       | 4.18    | 15.94 | 17.88 | 16.32      | 15.43   | 4.62   | 5.40  | 4.45  | 4.18  |
| F11R    | F11 receptor                                                                  | 29.89 | 35.16 | 28.20      | 30.76   | 8.47   | 10.80 | 9.27       | 10.05   | 29.89 | 35.16 | 28.20      | 30.76   | 8.47   | 10.80 | 9.27  | 10.05 |
| F2RL1   | F2R like trypsin receptor 1                                                   | 28.44 | 28.21 | 22.51      | 23.95   | 36.36  | 9.61  | 10.08      | 7.49    | 28.44 | 28.21 | 22.51      | 23.95   | 36.36  | 9.61  | 10.08 | 7.49  |
| F2RL2   | Coagulation factor II thrombin receptor like 2                                | 0.08  | 0.17  | 0.14       | 0.19    | 0.03   | 0.09  | 0.09       | 0.09    | 0.08  | 0.17  | 0.14       | 0.19    | 0.03   | 0.09  | 0.09  | 0.09  |
| F2RL3   | F2R like thrombin or trypsin receptor 3                                       | 0.29  | 0.51  | 0.46       | 0.54    | 0.14   | 0.25  | 0.20       | 0.26    | 0.29  | 0.51  | 0.46       | 0.54    | 0.14   | 0.25  | 0.20  | 0.26  |
| FABP2   | Fatty acid binding protein 2                                                  | 2.93  | 6.19  | 5.81       | 4.91    | 1.25   | 2.75  | 3.26       | 2.49    | 2.93  | 6.19  | 5.81       | 4.91    | 1.25   | 2.75  | 3.26  | 2.49  |
| FCERIA  | Fc fragment of IgE receptor Ia                                                | 1.45  | 0.97  | 0.98       | 0.94    | 0.79   | 0.72  | 0.59       | 0.49    | 1.45  | 0.97  | 0.98       | 0.94    | 0.79   | 0.72  | 0.59  | 0.49  |
| FCERIG  | Fc fragment of IgE receptor Ig                                                | 23.31 | 21.17 | 23.54      | 22.06   | 9.46   | 7.82  | 9.61       | 6.38    | 23.31 | 21.17 | 23.54      | 22.06   | 9.46   | 7.82  | 9.61  | 6.38  |
| FPR2    | Formyl peptide receptor 2                                                     | 0.07  | 0.18  | 0.05       | 0.03    | 0.16   | 0.81  | 0.09       | 0.04    | 0.07  | 0.18  | 0.05       | 0.03    | 0.16   | 0.81  | 0.09  | 0.04  |
| FST     | Follistatin                                                                   | 0.06  | 0.11  | 0.10       | 0.12    | 0.06   | 0.08  | 0.05       | 0.06    | 0.06  | 0.11  | 0.10       | 0.12    | 0.06   | 0.08  | 0.05  | 0.06  |
| GJA1    | Gap junction protein alpha 1                                                  | 6.76  | 9.09  | 9.52       | 9.78    | 2.82   | 3.53  | 3.52       | 2.62    | 6.76  | 9.09  | 9.52       | 9.78    | 2.82   | 3.53  | 3.52  | 2.62  |
| IL10    | Interleukin 10                                                                | 0.22  | 0.16  | 0.12       | 0.13    | 0.21   | 0.08  | 0.05       | 0.06    | 0.22  | 0.16  | 0.12       | 0.13    | 0.21   | 0.08  | 0.05  | 0.06  |
| IL12RB1 | Interleukin 12 receptor subunit beta 1                                        | 1.03  | 0.93  | 0.99       | 0.93    | 0.53   | 0.39  | 0.44       | 0.29    | 1.03  | 0.93  | 0.99       | 0.93    | 0.53   | 0.39  | 0.44  | 0.29  |
| IL13    | Interleukin 13                                                                | 0.00  | 0.00  | 0.00       | 0.00    | 0.01   | 0.01  | 0.00       | 0.01    | 0.00  | 0.00  | 0.00       | 0.00    | 0.01   | 0.01  | 0.00  | 0.01  |
| IL18    | Interleukin 18                                                                | 6.11  | 4.29  | 4.62       | 4.08    | 4.81   | 1.38  | 1.68       | 1.12    | 6.11  | 4.29  | 4.62       | 4.08    | 4.81   | 1.38  | 1.68  | 1.12  |
| IL1B    | Interleukin 1 beta                                                            | 2.57  | 1.77  | 2.04       | 1.94    | 3.61   | 0.93  | 3.53       | 1.30    | 2.57  | 1.77  | 2.04       | 1.94    | 3.61   | 0.93  | 3.53  | 1.30  |
| IL1RN   | Interleukin 1 receptor antagonist                                             | 2.62  | 1.48  | 1.25       | 1.35    | 2.77   | 1.34  | 0.66       | 1.50    | 2.62  | 1.48  | 1.25       | 1.35    | 2.77   | 1.34  | 0.66  | 1.50  |
| IL23A   | Interleukin 23 subunit alpha                                                  | 0.12  | 0.06  | 0.06       | 0.05    | 0.09   | 0.03  | 0.02       | 0.03    | 0.12  | 0.06  | 0.06       | 0.05    | 0.09   | 0.03  | 0.02  | 0.03  |
| IL33    | Interleukin 33                                                                | 81.93 | 2.41  | 2.03       | 6.91    | 354.64 | 7.85  | 2.44       | 16.34   | 81.93 | 2.41  | 2.03       | 6.91    | 354.64 | 7.85  | 2.44  | 16.34 |
| IL37    | Interleukin 37                                                                | 0.53  | 0.33  | 0.40       | 0.34    | 0.25   | 0.23  | 0.26       | 0.18    | 0.53  | 0.33  | 0.40       | 0.34    | 0.25   | 0.23  | 0.26  | 0.18  |
| IL6     | Interleukin 6                                                                 | 0.10  | 0.03  | 0.03       | 0.02    | 0.21   | 0.02  | 0.04       | 0.01    | 0.10  | 0.03  | 0.03       | 0.02    | 0.21   | 0.02  | 0.04  | 0.01  |
| JAM2    | Junctional adhesion molecule 2                                                | 1.45  | 1.44  | 1.37       | 1.54    | 1.07   | 0.56  | 0.54       | 0.52    | 1.45  | 1.44  | 1.37       | 1.54    | 1.07   | 0.56  | 0.54  | 0.52  |
| JAM3    | Junctional adhesion molecule 3                                                | 1.74  | 2.00  | 1.92       | 1.98    | 0.69   | 0.71  | 0.71       | 0.56    | 1.74  | 2.00  | 1.92       | 1.98    | 0.69   | 0.71  | 0.71  | 0.56  |

**Supplementary Table 1.** Continued

| Gene     | Description                                            | Mean   |        |            |         | SD     |        |            |         |
|----------|--------------------------------------------------------|--------|--------|------------|---------|--------|--------|------------|---------|
|          |                                                        | HC     | BL     | Mesalazine | Placebo | HC     | BL     | Mesalazine | Placebo |
| KIT      | KIT proto-oncogene, receptor tyrosine kinase           | 4.81   | 3.77   | 4.17       | 3.76    | 2.05   | 1.55   | 1.64       | 1.37    |
| LRBA     | LPS responsive beige-like anchor protein               | 6.48   | 6.26   | 6.03       | 5.83    | 2.24   | 1.57   | 1.45       | 1.41    |
| MIADCAM1 | Mucosal vascular addressin cell adhesion molecule 1    | 1.01   | 1.21   | 1.01       | 0.90    | 0.67   | 1.44   | 0.58       | 0.25    |
| MCL1     | MCL1 apoptosis regulator, BCL2 family member           | 73.47  | 57.43  | 52.04      | 58.90   | 87.43  | 16.94  | 16.20      | 26.52   |
| MMP2     | Matrix metalloproteinase 2                             | 8.31   | 12.90  | 11.26      | 11.30   | 2.99   | 5.14   | 4.31       | 3.03    |
| MT2A     | Metallothionein 2A                                     | 2.79   | 3.52   | 2.45       | 2.58    | 1.55   | 6.74   | 2.16       | 3.22    |
| MUC1     | Mucin 1, cell surface associated                       | 27.03  | 18.23  | 18.68      | 16.34   | 12.18  | 5.83   | 9.64       | 5.82    |
| MUC3B    | Mucin 3B, cell surface associated                      | 12.46  | 6.80   | 5.78       | 6.37    | 17.73  | 4.93   | 2.15       | 3.77    |
| MYD88    | MYD88 innate immune signal transduction adaptor        | 18.18  | 19.73  | 16.15      | 16.36   | 6.14   | 7.94   | 5.81       | 5.59    |
| NAT1     | N-acetyltransferase 1                                  | 2.00   | 2.43   | 2.25       | 2.01    | 0.70   | 0.94   | 0.86       | 0.48    |
| NAT2     | N-acetyltransferase 2                                  | 1.70   | 0.94   | 0.79       | 0.74    | 3.24   | 0.40   | 0.23       | 0.26    |
| NOD2     | Nucleotide binding oligomerization domain containing 2 | 0.16   | 0.20   | 0.18       | 0.20    | 0.09   | 0.10   | 0.09       | 0.10    |
| NOS2     | Nitric oxide synthase 2                                | 6.54   | 3.81   | 4.07       | 2.53    | 11.73  | 2.85   | 4.52       | 1.16    |
| NT5E     | 5'-nucleotidase ecto                                   | 9.72   | 14.07  | 11.77      | 12.74   | 2.96   | 6.77   | 5.07       | 4.93    |
| OCLN     | Occludin                                               | 38.84  | 13.15  | 11.63      | 11.55   | 103.77 | 4.30   | 4.10       | 4.09    |
| PDE4B    | Phosphodiesterase 4B                                   | 0.81   | 0.88   | 0.83       | 0.91    | 0.40   | 0.34   | 0.32       | 0.32    |
| PDE7A    | Phosphodiesterase 7A                                   | 2.92   | 2.22   | 2.16       | 2.03    | 2.24   | 0.89   | 0.90       | 0.64    |
| PLA2G2A  | Phospholipase A2 group IIA                             | 182.07 | 173.14 | 165.37     | 151.98  | 196.23 | 102.00 | 189.65     | 99.29   |
| PPARG    | Peroxisome proliferator activated receptor gamma       | 29.71  | 16.16  | 13.10      | 11.88   | 59.25  | 6.11   | 3.53       | 2.99    |
| PTGER1   | Prostaglandin E receptor 1                             | 0.10   | 0.13   | 0.09       | 0.13    | 0.06   | 0.08   | 0.06       | 0.09    |
| PTGES    | Prostaglandin E synthase                               | 0.73   | 0.67   | 0.64       | 0.59    | 0.32   | 0.29   | 0.34       | 0.19    |
| PTGES2   | Prostaglandin E synthase 2                             | 15.49  | 13.95  | 13.48      | 24.16   | 11.63  | 5.86   | 5.78       | 45.40   |
| PTGS1    | Prostaglandin-endoperoxide synthase 1                  | 2.95   | 4.20   | 3.75       | 4.08    | 1.00   | 1.61   | 1.25       | 1.09    |
| PTGS2    | Prostaglandin-endoperoxide synthase 2                  | 0.39   | 0.43   | 0.41       | 0.42    | 0.22   | 0.22   | 0.17       | 0.15    |
| SE       | Fucosyltransferase 2                                   | 26.33  | 21.07  | 17.46      | 17.16   | 21.69  | 12.92  | 8.85       | 9.95    |
| SOD1     | Superoxide dismutase 1                                 | 29.22  | 24.13  | 23.31      | 21.27   | 9.58   | 7.00   | 6.58       | 5.53    |
| TBXAS1   | Thromboxane A synthase 1                               | 19.46  | 4.45   | 3.71       | 3.94    | 51.61  | 2.20   | 1.55       | 1.31    |
| TGFB1    | Transforming growth factor beta 1                      | 16.04  | 7.96   | 7.42       | 8.34    | 15.30  | 3.18   | 2.74       | 2.21    |
| TGFBR1   | Transforming growth factor beta receptor 1             | 21.31  | 4.69   | 4.22       | 4.22    | 79.05  | 1.53   | 1.33       | 0.98    |
| TGFBR2   | Transforming growth factor beta receptor 2             | 18.66  | 18.31  | 17.49      | 17.44   | 16.39  | 4.89   | 4.69       | 4.04    |
| TJP1     | Tight junction protein 1                               | 7.13   | 10.35  | 8.57       | 8.62    | 2.95   | 3.08   | 2.79       | 2.79    |
| TJP2     | Tight junction protein 2                               | 14.84  | 15.18  | 13.24      | 13.47   | 8.59   | 5.12   | 4.77       | 5.47    |
| TJP3     | Tight junction protein 3                               | 8.88   | 11.20  | 9.37       | 9.41    | 2.55   | 3.53   | 3.81       | 3.06    |
| TTLR2    | Toll like receptor 2                                   | 0.19   | 0.27   | 0.21       | 0.18    | 0.08   | 0.40   | 0.12       | 0.07    |
| TTLR4    | Toll like receptor 4                                   | 1.49   | 2.56   | 1.89       | 2.04    | 0.54   | 0.80   | 0.79       | 0.56    |
| TTLR5    | Toll like receptor 5                                   | 0.22   | 0.29   | 0.17       | 0.19    | 0.13   | 0.46   | 0.06       | 0.06    |

**Supplementary Table 1.** Continued

| Gene      | Description                                                      | Mean   |        |            |         | SD    |       |            |         |
|-----------|------------------------------------------------------------------|--------|--------|------------|---------|-------|-------|------------|---------|
|           |                                                                  | HC     | BL     | Mesalazine | Placebo | HC    | BL    | Mesalazine | Placebo |
| TLR7      | Toll like receptor 7                                             | 1.04   | 0.45   | 0.36       | 0.39    | 3.06  | 0.26  | 0.16       | 0.16    |
| TLR9      | Toll like receptor 9                                             | 2.07   | 1.30   | 0.87       | 1.00    | 1.76  | 1.47  | 0.48       | 0.37    |
| TNF       | Tumor necrosis factor                                            | 2.07   | 1.30   | 0.87       | 1.00    | 1.76  | 1.47  | 0.48       | 0.37    |
| TNFRSF10A | TNF receptor superfamily member 10a                              | 4.33   | 2.66   | 2.48       | 2.70    | 6.88  | 1.04  | 1.14       | 1.08    |
| TNFRSF25  | TNF receptor superfamily member 25                               | 8.47   | 6.25   | 6.21       | 5.64    | 3.40  | 2.12  | 1.89       | 2.36    |
| TNFSF10   | TNF superfamily member 10                                        | 22.81  | 28.95  | 22.66      | 23.13   | 8.77  | 12.51 | 6.12       | 11.82   |
| TNFSF15   | TNF superfamily member 15                                        | 1.12   | 1.19   | 0.87       | 0.90    | 0.94  | 0.85  | 0.43       | 0.29    |
| TOLLIP    | Toll interacting protein                                         | 8.23   | 8.62   | 7.29       | 7.81    | 2.89  | 2.53  | 1.91       | 2.47    |
| TPH1      | Tryptophan hydroxylase 1                                         | 24.75  | 7.48   | 6.38       | 7.13    | 44.51 | 3.01  | 3.21       | 2.79    |
| TPSB2     | Tryptase beta 2 (gene/pseudogene)                                | 150.05 | 106.36 | 102.11     | 97.56   | 64.39 | 61.85 | 44.51      | 61.41   |
| TRPA1     | Transient receptor potential cation channel subfamily A member 1 | 7.12   | 8.12   | 6.50       | 8.78    | 11.02 | 3.84  | 2.07       | 3.16    |
| VCAM1     | Vascular cell adhesion molecule 1                                | 2.43   | 2.53   | 3.11       | 2.75    | 1.51  | 1.21  | 1.38       | 1.02    |
| VNN1      | Vanin 1                                                          | 8.64   | 2.39   | 1.57       | 1.75    | 23.55 | 3.44  | 2.08       | 2.45    |

SD, standard deviation; HC, healthy controls; BL, baseline.

Gene expression measurements were calculated as  $2^{-(Ct)}$  using the geometric mean of 4 reference genes described in Materials and Methods section and values are given as arbitrary units.

**Supplementary Table 2.** Genes Correlating With Toll-like 4 Expression in the Irritable Bowel Syndrome Patient Cohort

| Genes   | Spearman correlation | q-value  |
|---------|----------------------|----------|
| BDKRB2  | 0.526                | 0        |
| CMKLR1  | 0.515                | 5.97E-08 |
| F11R    | 0.572                | 2.17E-06 |
| F2RL1   | 0.575                | 1.77E-05 |
| FUT2    | 0.418                | 0.002366 |
| MCL1    | 0.581                | 1.34E-05 |
| MMP2    | 0.403                | 3.12E-06 |
| MYD88   | 0.639                | 3.95E-08 |
| OCLN    | 0.515                | 6.40E-05 |
| PPARG   | 0.525                | 0.00053  |
| TGFBR2  | 0.516                | 1.77E-07 |
| TJP1    | 0.539                | 1.09E-05 |
| TJP2    | 0.406                | 0.00084  |
| TNBP2   | 0.368                | 1.06E-05 |
| TNFSF10 | 0.496                | 4.04E-06 |
| TNFSF15 | 0.388                | 0.000906 |
| TOLLIP  | 0.426                | 0.00043  |
| TRPA1   | 0.552                | 5.34E-06 |

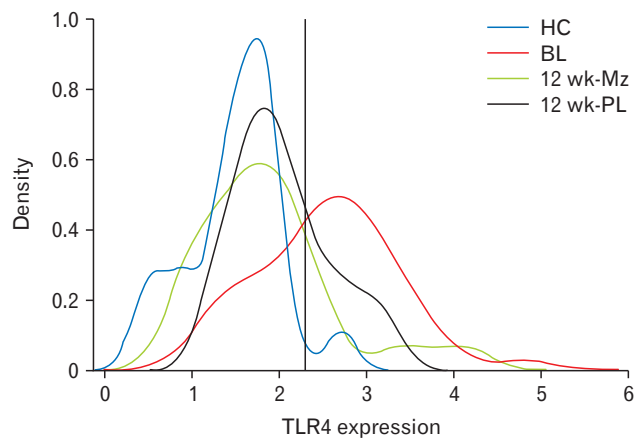

**Supplementary Figure 1.** Estimation of the Toll-like receptor 4 (TLR4) threshold. The distribution of the TLR4 expression values was plotted as a density plot to evaluate the threshold of high and low TLR4 expression. The 1.5 times the standard deviation of the healthy controls (HC) expression values was selected. The threshold value is indicated with a straight line at 2.4 expression value. BL, baseline; MZ, mesalazine group; PL, Placebo group.

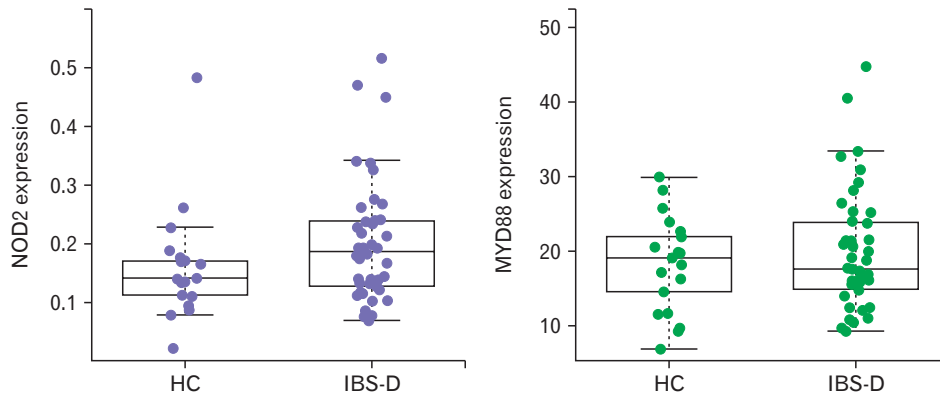

**Supplementary Figure 2.** Mucosal biopsy gene expression at baseline in healthy controls (HC) and patients with diarrhea-predominant irritable bowel syndrome (IBS-D). There was no statistically significant difference in the expression levels of (A) nucleotide-binding oligomerization domain-containing protein 2 (NOD2) or (B) myeloid differentiation factor 88 (MyD88) between HC and IBS-D patients at baseline. The line in the box shows the median expression value, boxes indicate the upper (75th percentile) and lower quartiles (25th percentile) of the data, significant difference between HC and IBS-D patients is indicated with asterisk.

**Supplementary Method.** Micro-fluidic cards were loaded and analyzed as per manufacturer's instructions. In brief, 60  $\mu\text{L}$  of cDNA was created using 1  $\mu\text{g}$  of RNA and Superscript III reverse transcriptase (Cat. No. 18080-093; Invitrogen, Carlsbad, CA, USA), according to manufacturer's instructions. Fifty microliter of diethyl pyrocarbonate (D5758; Sigma-Aldrich, St. Louis, MO, USA) treated high-performance liquid chromatography grade water and 110  $\mu\text{L}$  of Universal Taqman master mix (P/N 4304437; Applied Biosystems, Foster City, CA, USA) was added to create a final volume of 220  $\mu\text{L}$ . The micro-fluidic gene card has 8 wells, with 2 wells for each of the 4 samples. One hundred microliter of the samples were placed in their corresponding wells and the plate centrifuged twice at 1200 rpm for 1 minute using a Sorvall ST40 centrifuge (Thermoscientific, Loughborough, UK). The plate was sealed with a plate sealer (Model 4331770 Rev A.5; Applied Biosystems) and loaded into the 7900HT Fast Real-Time PCR system analyser (Applied Biosystems).
